# Supplementary material
Source: Springer Nature journal article supplement (https://www.springermedizin.de/resource/supplementary/13601_2013_305_MOESM2_ESM.pdf/9677868)

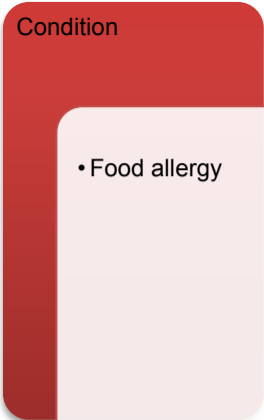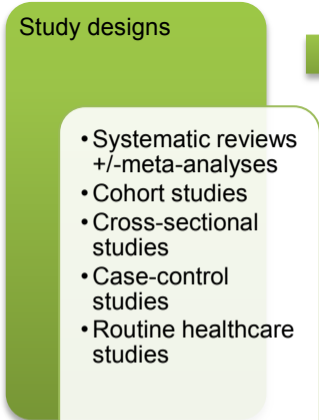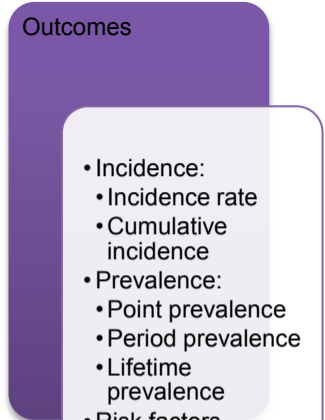

Supplement: MOESM2 [file 9677868]
